# Supplementary material
Source: bioRxiv or medRxiv preprint supplement (https://www.biorxiv.org/highwire/filestream/72894/field_highwire_adjunct_files/1/238303-2.pdf)
Supplement: Supplementary file [file 238303-2.pdf]

Supporting material for:

# Mathematical models for cell migration with real-time cell cycle dynamics

Sean T. Vittadello<sup>1</sup>, Scott W. McCue<sup>1</sup>, Gency Gunasingh<sup>2</sup>,  
Nikolas K. Haass<sup>2,3</sup>, Matthew J. Simpson<sup>1,\*</sup>

---

<sup>1</sup> School of Mathematical Sciences, Queensland University of Technology, PO Box 2434, Brisbane 4001, Australia.

<sup>2</sup> The University of Queensland, The University of Queensland Diamantina Institute, Translational Research Institute, 37 Kent St, Woolloongabba, Brisbane, QLD 4102, Australia.

<sup>3</sup> Discipline of Dermatology, Faculty of Medicine, Central Clinical School, University of Sydney, Sydney, NSW, Australia.

\* E-mail: matthew.simpson@qut.edu.au

# Contents

|          |                                                                    |          |
|----------|--------------------------------------------------------------------|----------|
| <b>1</b> | <b>Numerical solutions of the mathematical model</b>               | <b>2</b> |
| <b>2</b> | <b>Scratch assay of FUCCI-transduced WM983C melanoma cells</b>     | <b>3</b> |
| <b>3</b> | <b>Numerical solutions demonstrating travelling wave behaviour</b> | <b>5</b> |
|          | <b>References</b>                                                  | <b>6</b> |

# 1 Numerical solutions of the mathematical model

The numerical solutions of Eqs (2)–(3) and Eqs (4)–(6) are obtained using an implicit finite difference approximation. In particular, we use a central difference approximation for the spatial derivative term, and a backward Euler approximation for the temporal derivative [1]. The spatial domain,  $0 \leq x \leq L$ , is uniformly discretised with grid spacing  $\Delta x$ . No-flux boundary conditions are implemented at both  $x = 0$  and  $x = L$ . The temporal domain is uniformly discretised with time steps of duration  $\Delta t$ . The resulting non-linear system of equations is solved using the Thomas algorithm [1], applying Picard iteration at each time step until the maximum absolute change in the given dependent variable across the spatial grid is less than a specified tolerance,  $\epsilon$ .

## **2 Comparison of experimental data and the fundamental model for a scratch assay of FUCCI-transduced WM983C melanoma cells.**

In Fig S1 we present experimental data for the WM983C melanoma cell line, together with corresponding numerical solutions of the fundamental model. The numerical solutions compare well with the experimental data.

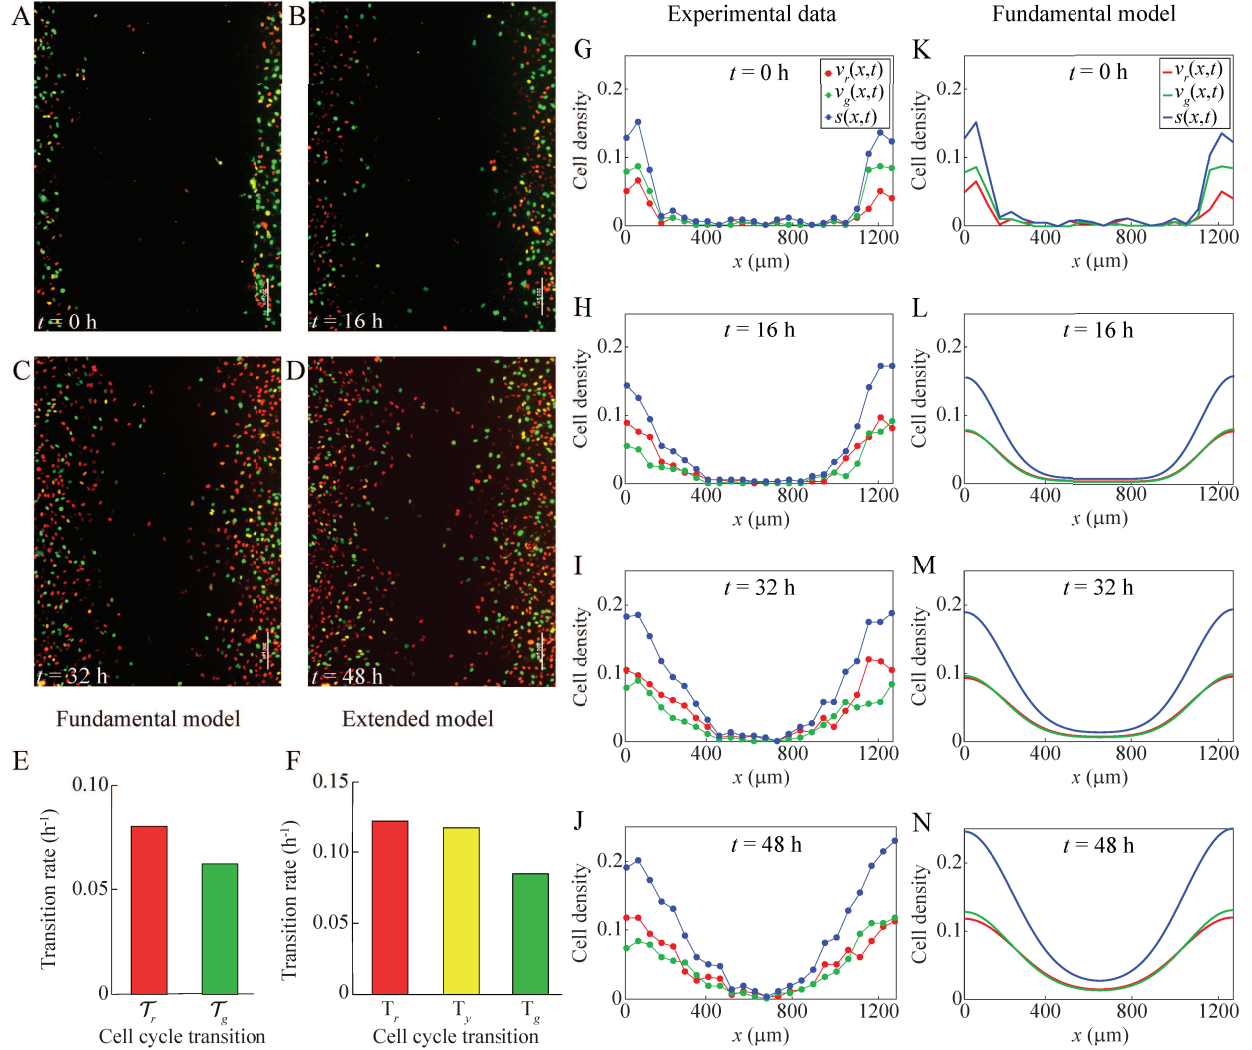

**Figure S1: Comparison of experimental data and the fundamental model for a scratch assay of FUCCI-transduced WM983C melanoma cells.** (A)–(D) Still images of a scratch assay with FUCCI-transduced WM983C melanoma cells at time 0 h, 16 h, 32 h and 48 h, respectively. Scale bar is  $200 \mu\text{m}$ . (E) Estimated transition rates from one cell cycle phase to the next for the fundamental model with two subpopulations, based on data from the WM983C cell line from Fig 1C in [2]. (F) Estimated transition rates from one cell cycle phase to the next for the extended model with three subpopulations, based on data from the WM983C cell line from Fig 1C in [2]. (G)–(J) Experimental non-dimensional cell density data at 0 h, 16 h, 32 h and 48 h, respectively (based on images (A)–(D)). The cell density is treated as a function of  $x$  and  $t$  only, owing to the fact that the initial density does not depend on the vertical coordinate,  $y$ . (K)–(N) Numerical solutions of the fundamental model, Eqs (2)–(3), at 0 h, 16 h, 32 h and 48 h. The numerical solutions are obtained with  $\Delta x = 0.1 \mu\text{m}$ ,  $\Delta t = 0.1 \text{h}$ ,  $L = 1254 \mu\text{m}$ , diffusion coefficients  $\mathcal{D}_r = \mathcal{D}_g = 400 \mu\text{m}^2 \text{h}^{-1}$ , transition rates  $\kappa_r = 0.080 \text{h}^{-1}$  and  $\kappa_g = 0.062 \text{h}^{-1}$ , and initial conditions the same as for the experimental data.

### 3 Numerical solutions demonstrating travelling wave behaviour for the fundamental model when $\mathcal{D} \neq 1$ .

In Fig S2 we present numerical solutions of the fundamental model, Eqs (2)–(3), with  $\mathcal{D} \neq 1$ . In Fig S2A,  $\mathcal{D} = 0.5$ , and in Fig S2B,  $\mathcal{D} = 2$ . These solutions are qualitatively the same as for  $\mathcal{D} = 1$ , see Fig 3, demonstrating that the existence of these travelling waves is robust, and does not depend on the value of  $\mathcal{D}_g/\mathcal{D}_r$ .

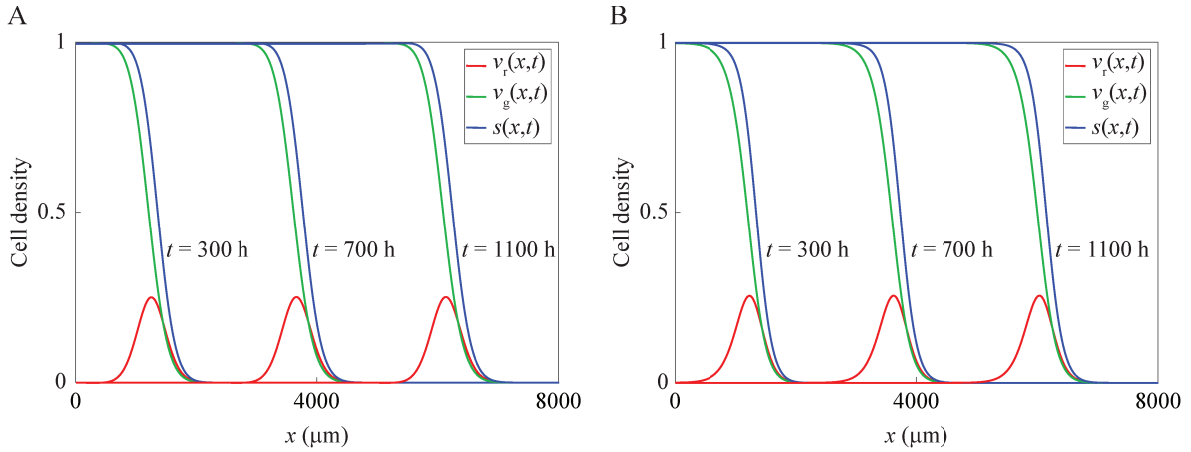

**Figure S2: Numerical solutions of the fundamental model, Eqs (2)–(3), demonstrating travelling wave behaviour with  $\mathcal{D} \neq 1$ .** (A) Solutions obtained with  $\Delta x = 0.1 \mu\text{m}$ ,  $\Delta t = 0.1 \text{h}$ ,  $L = 8000 \mu\text{m}$ ,  $\mathcal{D}_r = 400 \mu\text{m}^2 \text{h}^{-1}$ ,  $\mathcal{D}_g = 200 \mu\text{m}^2 \text{h}^{-1}$ ,  $\kappa_r = \kappa_g = 0.08 \text{h}^{-1}$ , and the initial condition given by Eq (9) with  $\xi = 10$ . (B) Solutions obtained with  $\Delta x = 0.1 \mu\text{m}$ ,  $\Delta t = 0.1 \text{h}$ ,  $L = 8000 \mu\text{m}$ ,  $\mathcal{D}_r = 200 \mu\text{m}^2 \text{h}^{-1}$ ,  $\mathcal{D}_g = 400 \mu\text{m}^2 \text{h}^{-1}$ ,  $\kappa_r = \kappa_g = 0.08 \text{h}^{-1}$ , and the initial condition given by Eq (9) with  $\xi = 10$ .

## References

- [1] Morton, K. W. and D. F. Mayers, 2005. Numerical Solution of Partial Differential Equations. 2nd ed. Cambridge: Cambridge University Press.
  
- [2] Haass, N. K., K. A. Beaumont, D. S. Hill, A. Anfosso, P. Mrass, M. A. Munoz, I. Kinjyo, and W. Weninger, 2014. Real-time cell cycle imaging during melanoma growth, invasion, and drug response. *Pigment Cell Melanoma Res.* 27:764–776.
